# Supplementary material
Source: PubMed Central journal article supplement (PMC6706181)
Supplement: JOH2-57-521-s001.pdf [file JOH2-57-521-s001.pdf]

Appendix 1. Study phase and development process

| <b>Study phase</b> | <b>Aim</b>                                                                                                          | <b>Subjects and Methods</b>                                                                      |
|--------------------|---------------------------------------------------------------------------------------------------------------------|--------------------------------------------------------------------------------------------------|
| Development stage  | To conceptualize a construct<br>To generate items<br>To examine content validity                                    | Focus group discussion<br>Interview                                                              |
| Pilot testing      | To examine a structural validity<br>To select items<br><br>To refine items and examine fitness to the<br>Rash model | Internet survey (n=1000)<br>Exploratory and confirmatory factor analyses<br>Rasch model analysis |
| Field testing      | To examine construct validity<br><br>To examine differential test functioning                                       | Manufacturing worker (n=1294)<br><br>Additional samples from 5 workplaces                        |

Appendix 2. A formative model and a reflective model of work impairment due to health problems

Items for particular job disruptions



### Appendix 3. Candidate items

---

Compared with when you're in a typically good physical condition, how often do you currently experience the following situations?

- Item 1 I have felt that having a conversation is a pain.
- Item 2 I have not been able to smile.
- Item 3 Being affable required an effort.
- Item 4 I haven't been able to behave socially.
- Item 5 I have had a communication problem.
- Item 6 I haven't been able to utilize specialized knowledge and skill.
- Item 7 I have lacked ideas and inspiration.
- Item 8 I haven't been able to work with curiosity.
- Item 9 I haven't been able to maintain the quality of my work.
- Item 10 I have taken too long to complete work.
- Item 11 I have had trouble thinking clearly.
- Item 12 I have lacked the ability to concentration.
- Item 13 The number of mistakes I make has increased.
- Item 14 I have taken longer breaks.
- Item 15 I have taken more rests during my work.
- Item 16 I have had some difficulty reading texts.
- Item 17 I have had some difficulty preparing documents.
- Item 18 I have felt very drowsy at work.
- Item 19 I have felt that my work isn't going well.
- Item 20 I have felt that rules and instructions were inconvenient.
- Item 21 I haven't been able to make rational decisions.
- Item 22 I haven't been able to keep my goal in mind at work.
- Item 23 I could not find the work before others.
- Item 24 I have spent time doing things that were not necessary at that moment.
- Item 25 I have felt like time is passing slowly.
- Item 26 I haven't been proactive about my work.
- Item 27 I haven't been motivated.
- Item 28 I have thought of changing, leaving, or reallocating jobs due to my health
- Item 29 I haven't wanted to pick up the phone.
- Item 30 I haven't put any effort into self-improvement (qualification learning, English conversation, personal empowerment, workshop participation, etc.).

The items were originally developed in Japanese, and these were translated only for publication purposes and have not been verified with respect to back translation or cross-cultural differences. The Japanese version of the WFun is available from the corresponding author upon request.

Appendix 4. Preliminary Rasch analysis and item fit statistics

| Items   | Measure | SE   | Infit<br>mean-square | Outfit<br>mean-square | Reason for deletion |
|---------|---------|------|----------------------|-----------------------|---------------------|
| Item 1  | -0.59   | 0.04 | 1.14                 | 1.16                  | Not necessary       |
| Item 2  | -0.42   | 0.04 | 0.99                 | 1.06                  | Not necessary       |
| Item 3  | -0.54   | 0.04 | 1.05                 | 0.97                  | Not necessary       |
| Item 4  | -0.31   | 0.04 | 0.97                 | 0.9                   |                     |
| Item 5  | 0.33    | 0.05 | 1.08                 | 0.87                  |                     |
| Item 6  | 0.63    | 0.05 | 1.16                 | 0.89                  | Not necessary       |
| Item 7  | -0.12   | 0.04 | 0.92                 | 0.9                   | Not necessary       |
| Item 8  | -0.27   | 0.04 | 0.85                 | 0.78                  | Not necessary       |
| Item 9  | -0.24   | 0.04 | 0.89                 | 1.11                  |                     |
| Item 10 | -0.39   | 0.04 | 0.99                 | 1.24                  | Not necessary       |
| Item 11 | -0.38   | 0.04 | 0.74                 | 0.73                  |                     |
| Item 12 | -0.77   | 0.04 | 0.82                 | 1.01                  |                     |
| Item 13 | 0.07    | 0.04 | 0.9                  | 0.84                  |                     |
| Item 14 | 0.02    | 0.04 | 1.49                 | 1.87                  | Misfit              |
| Item 15 | 0.23    | 0.04 | 1.21                 | 1.25                  |                     |
| Item 16 | 0.59    | 0.05 | 1.23                 | 1.01                  | Not necessary       |
| Item 17 | 0.6     | 0.05 | 1.1                  | 0.91                  | Not necessary       |
| Item 18 | -0.15   | 0.04 | 1.51                 | 1.86                  | Misfit              |
| Item 19 | -0.2    | 0.04 | 0.81                 | 0.87                  |                     |
| Item 20 | 0.28    | 0.04 | 0.97                 | 0.76                  | Not necessary       |
| Item 21 | 0.24    | 0.04 | 0.74                 | 0.69                  |                     |
| Item 22 | 0.31    | 0.05 | 0.78                 | 0.61                  |                     |
| Item 23 | 0.26    | 0.04 | 0.81                 | 0.68                  | Not necessary       |
| Item 24 | 0.26    | 0.04 | 0.97                 | 0.84                  | Not necessary       |
| Item 25 | -0.26   | 0.04 | 1.34                 | 1.62                  | Misfit              |
| Item 26 | 0.1     | 0.04 | 0.73                 | 0.66                  |                     |
| Item 27 | -0.73   | 0.04 | 1.04                 | 1.2                   |                     |
| Item 28 | 0.78    | 0.05 | 1.6                  | 1.17                  | Misfit              |
| Item 29 | 0.31    | 0.05 | 1.31                 | 1.05                  | Not necessary       |
| Item 30 | 0.37    | 0.05 | 1.34                 | 1.08                  | Not necessary       |

Appendix 6. Factor loadings after promax rotation and inter-item and item-total correlations.

| Item       | Factor loadings<br>(blanks represent <.4) |                        |                           |                         | Within each factor       |                                     |                     |
|------------|-------------------------------------------|------------------------|---------------------------|-------------------------|--------------------------|-------------------------------------|---------------------|
|            | Factor 1<br>(motivation)                  | Factor2<br>(execution) | Factor 3<br>(sociability) | Factor 4<br>(tolerance) | Item-rest<br>correlation | Cronbach's alpha<br>if item deleted | Cronbach's<br>alpha |
| Item 1     |                                           |                        | 0.77                      |                         | 0.82                     | 0.93                                | 0.941               |
| Item 2     |                                           |                        | 0.87                      |                         | 0.88                     | 0.92                                |                     |
| Item 3     |                                           |                        | 0.79                      |                         | 0.85                     | 0.93                                |                     |
| Item 4     |                                           |                        | 0.81                      |                         | 0.88                     | 0.92                                |                     |
| Item 5     |                                           |                        | 0.67                      |                         | 0.78                     | 0.94                                |                     |
| Item 6     |                                           | 0.47                   |                           |                         | 0.74                     | 0.94                                | 0.943               |
| Item 7     |                                           | 0.63                   |                           |                         | 0.82                     | 0.93                                |                     |
| Item 8     |                                           | 0.52                   |                           |                         | 0.82                     | 0.93                                |                     |
| Item 9     |                                           | 0.49                   |                           |                         | 0.78                     | 0.94                                |                     |
| Item 10    |                                           | 0.50                   |                           |                         | 0.76                     | 0.94                                |                     |
| Item 11    |                                           | 0.69                   |                           |                         | 0.85                     | 0.93                                |                     |
| Item 12    |                                           | 0.58                   |                           |                         | 0.80                     | 0.94                                |                     |
| Item 13    |                                           | 0.55                   |                           |                         | 0.80                     | 0.94                                |                     |
| Item 14    |                                           |                        |                           | 0.76                    | 0.71                     | 0.89                                |                     |
| Item 15    |                                           |                        |                           | 0.85                    | 0.82                     | 0.87                                |                     |
| Item 16    |                                           |                        |                           | 0.76                    | 0.81                     | 0.87                                |                     |
| Item 17    |                                           |                        |                           | 0.74                    | 0.83                     | 0.87                                |                     |
| Item 18    |                                           |                        |                           | 0.42                    | 0.64                     | 0.91                                |                     |
| Item 19    | 0.45                                      |                        |                           |                         | 0.82                     | 0.96                                | 0.959               |
| Item 20    | 0.62                                      |                        |                           |                         | 0.83                     | 0.95                                |                     |
| Item 21    | 0.45                                      |                        |                           |                         | 0.84                     | 0.95                                |                     |
| Item 22    | 0.53                                      |                        |                           |                         | 0.86                     | 0.95                                |                     |
| Item 23    | 0.50                                      |                        |                           |                         | 0.85                     | 0.95                                |                     |
| Item 24    | 0.48                                      |                        |                           |                         | 0.80                     | 0.96                                |                     |
| Item 25    | 0.69                                      |                        |                           |                         | 0.71                     | 0.96                                |                     |
| Item 26    | 0.61                                      |                        |                           |                         | 0.86                     | 0.95                                |                     |
| Item 27    | 0.63                                      |                        |                           |                         | 0.75                     | 0.96                                |                     |
| Item 28    | 0.58                                      |                        |                           |                         | 0.72                     | 0.96                                |                     |
| Item 29    | 0.55                                      |                        |                           |                         | 0.77                     | 0.96                                |                     |
| Item 30    | 0.50                                      |                        |                           |                         | 0.77                     | 0.96                                |                     |
| Eigenvalue | 17.6                                      | 16.8                   | 15.3                      | 15.0                    |                          |                                     |                     |

Appendix 7. Discriminant and convergent validity of raw scores according to characteristics in the pilot study (n=1000)

|                                                                                  | n   | Mean | SD  | p *                 |
|----------------------------------------------------------------------------------|-----|------|-----|---------------------|
| Sex                                                                              |     |      |     |                     |
| Men                                                                              | 500 | 14.6 | 7.5 | 0.584               |
| Women                                                                            | 500 | 14.3 | 6.9 |                     |
| Age group                                                                        |     |      |     |                     |
| 20-29                                                                            | 200 | 16.2 | 7.7 | <0.001              |
| 30-39                                                                            | 200 | 14.7 | 7.7 |                     |
| 40-49                                                                            | 200 | 15.2 | 7.7 |                     |
| 50-59                                                                            | 200 | 13.8 | 6.7 |                     |
| 60-69                                                                            | 200 | 12.3 | 5.6 |                     |
| Employment status                                                                |     |      |     |                     |
| Full time                                                                        | 542 | 15.0 | 7.6 | 0.172               |
| Non-regular employee<br>(temporary worker, contract employee)                    | 93  | 14.3 | 7.2 |                     |
| Part time                                                                        | 239 | 13.5 | 6.3 |                     |
| Self-employed                                                                    | 110 | 13.9 | 6.9 |                     |
| Contract (outsourcing)                                                           | 16  | 14.9 | 5.8 |                     |
| Job type                                                                         |     |      |     |                     |
| Mainly desk work                                                                 | 512 | 14.8 | 7.4 | 0.284               |
| Mainly jobs involving interpersonal communication                                | 231 | 14.0 | 6.8 |                     |
| Mainly labor                                                                     | 257 | 14.1 | 7.0 |                     |
| Annual income                                                                    |     |      |     |                     |
| < 1,000,000 JPY                                                                  | 136 | 13.9 | 7.1 | 0.208               |
| 1,000,000-2,000,000 JPY                                                          | 173 | 13.8 | 6.9 |                     |
| 2,000,000-3,000,000 JPY                                                          | 167 | 14.8 | 7.3 |                     |
| 3,000,000-5,000,000 JPY                                                          | 270 | 15.1 | 7.6 |                     |
| 5,000,000-7,000,000 JPY                                                          | 141 | 13.5 | 6.8 |                     |
| 7,000,000-10,000,000 JPY                                                         | 83  | 14.6 | 6.9 |                     |
| > 10,000,000 JPY                                                                 | 30  | 15.8 | 8.1 |                     |
| I have changed my work routine                                                   |     |      |     |                     |
| Not at all                                                                       | 646 | 12.6 | 6.4 | <0.001 <sup>+</sup> |
| One or more days a month                                                         | 159 | 14.2 | 5.4 |                     |
| About one day a week                                                             | 96  | 18.5 | 7.2 |                     |
| Two or more days a week                                                          | 72  | 21.3 | 6.8 |                     |
| Almost everyday                                                                  | 27  | 26.1 | 8.2 |                     |
| I have postponed a troublesome task                                              |     |      |     |                     |
| Not at all                                                                       | 542 | 12.2 | 6.4 | <0.001 <sup>+</sup> |
| One or more days a month                                                         | 193 | 13.4 | 5.1 |                     |
| About one day a week                                                             | 121 | 17.0 | 6.2 |                     |
| Two or more days a week                                                          | 102 | 20.1 | 6.5 |                     |
| Almost everyday                                                                  | 42  | 27.1 | 7.0 |                     |
| I have changed a work schedule                                                   |     |      |     |                     |
| Not at all                                                                       | 661 | 12.6 | 6.3 | <0.001 <sup>+</sup> |
| One or more days a month                                                         | 160 | 14.6 | 5.9 |                     |
| About one day a week                                                             | 98  | 19.3 | 6.8 |                     |
| Two or more days a week                                                          | 60  | 20.9 | 7.3 |                     |
| Almost everyday                                                                  | 21  | 29.8 | 4.2 |                     |
| I asked other staff to take a part/all of my task                                |     |      |     |                     |
| Not at all                                                                       | 799 | 13.3 | 6.7 | <0.001 <sup>+</sup> |
| One or more days a month                                                         | 110 | 16.0 | 6.0 |                     |
| About one day a week                                                             | 49  | 21.6 | 6.0 |                     |
| Two or more days a week                                                          | 32  | 21.3 | 8.0 |                     |
| Almost everyday                                                                  | 10  | 29.6 | 8.4 |                     |
| The content or amount of my work has been                                        |     |      |     |                     |
| Not at all                                                                       | 803 | 13.1 | 6.5 | <0.001 <sup>+</sup> |
| One or more days a month                                                         | 88  | 16.9 | 6.0 |                     |
| About one day a week                                                             | 53  | 20.8 | 7.1 |                     |
| Two or more days a week                                                          | 34  | 21.8 | 6.9 |                     |
| Almost everyday                                                                  | 22  | 27.2 | 8.4 |                     |
| My work hours have been changed                                                  |     |      |     |                     |
| Not at all                                                                       | 801 | 13.2 | 6.6 | <0.001 <sup>+</sup> |
| One or more days a month                                                         | 87  | 15.7 | 5.9 |                     |
| About one day a week                                                             | 52  | 19.7 | 6.8 |                     |
| Two or more days a week                                                          | 39  | 21.7 | 6.6 |                     |
| Almost everyday                                                                  | 21  | 28.3 | 7.0 |                     |
| I could not take on some work due to poor health condition                       |     |      |     |                     |
| Not at all                                                                       | 786 | 13.2 | 6.6 | <0.001 <sup>+</sup> |
| One or more days a month                                                         | 113 | 16.6 | 6.4 |                     |
| About one day a week                                                             | 53  | 19.8 | 6.6 |                     |
| Two or more days a week                                                          | 33  | 22.0 | 7.1 |                     |
| Almost everyday                                                                  | 15  | 28.5 | 8.6 |                     |
| SF-8                                                                             |     |      |     |                     |
| 0-14                                                                             | 127 | 9.7  | 4.8 | <0.001 <sup>+</sup> |
| 15-19                                                                            | 289 | 11.4 | 4.6 |                     |
| 20-24                                                                            | 306 | 14.2 | 6.1 |                     |
| 25-29                                                                            | 194 | 18.4 | 7.2 |                     |
| 30-                                                                              | 84  | 24.1 | 7.8 |                     |
| Stanford Performance Scale                                                       |     |      |     |                     |
| 0-19                                                                             | 112 | 9.0  | 2.3 | <0.001 <sup>+</sup> |
| 20-24                                                                            | 184 | 10.5 | 3.9 |                     |
| 25-29                                                                            | 317 | 14.3 | 6.2 |                     |
| 30-34                                                                            | 313 | 16.4 | 7.4 |                     |
| 35-                                                                              | 74  | 24.7 | 7.4 |                     |
| Follow-up status after 3 months                                                  |     |      |     |                     |
| I missed work more than 1 day due to bad health condition (including paid leave) | 148 | 19.5 | 8.2 | <0.001              |
| I took a leave of absence                                                        | 11  | 27.1 | 6.3 |                     |
| I left a job and am currently not working                                        | 13  | 20.5 | 8.9 |                     |
| I moved to a different job                                                       | 14  | 15.6 | 9.0 |                     |
| None of the above                                                                | 681 | 14.5 | 6.5 |                     |

\* P values were derived from ANOVA.

<sup>+</sup> P values were derived from ANOVA with the linear trend test.
